# Supplementary material for: Graphene-constructed flower-like porous Co(OH)2 with tunable hierarchical morphologies for supercapacitors
Source: Royal Society of Chemistry journal article supplement (doi:10.1039/c6ra00562d), 2016-01-01
Supplement: c6ra00562d1.pdf [file c6ra00562d1.pdf]

## Supporting Information

# Graphene-constructed flower-like porous Co(OH)<sub>2</sub> with tunable hierarchical morphologies for supercapacitors

Qi Huang, Jinzuan Wang, Fan Liu, Xing Chang, Hongyan Chen, Hualin Lin\*, and Sheng Han\*

*School of Chemical and Environmental Engineering, Shanghai Institute of Technology, Shanghai 201418, China. E-mail: lhl6534@163.com and hansheng654321@sina.com*

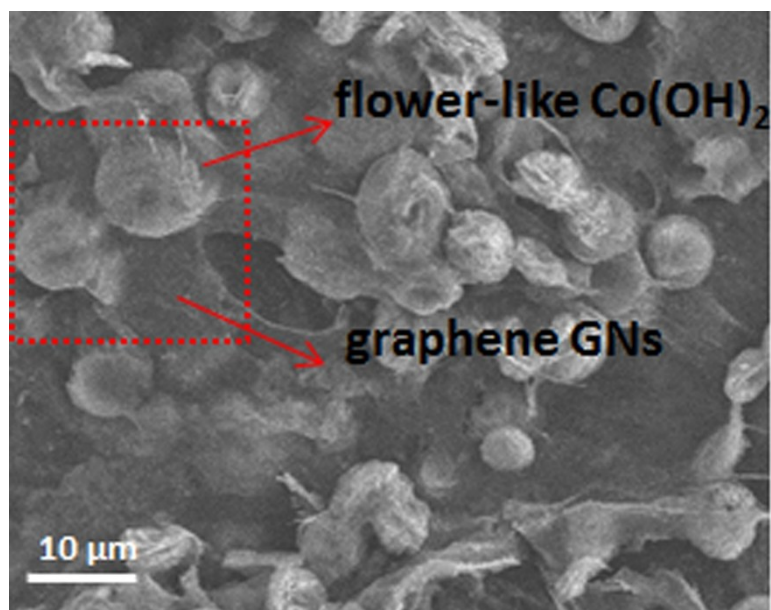

**Fig. S1** SEM image of GFC (1:10).

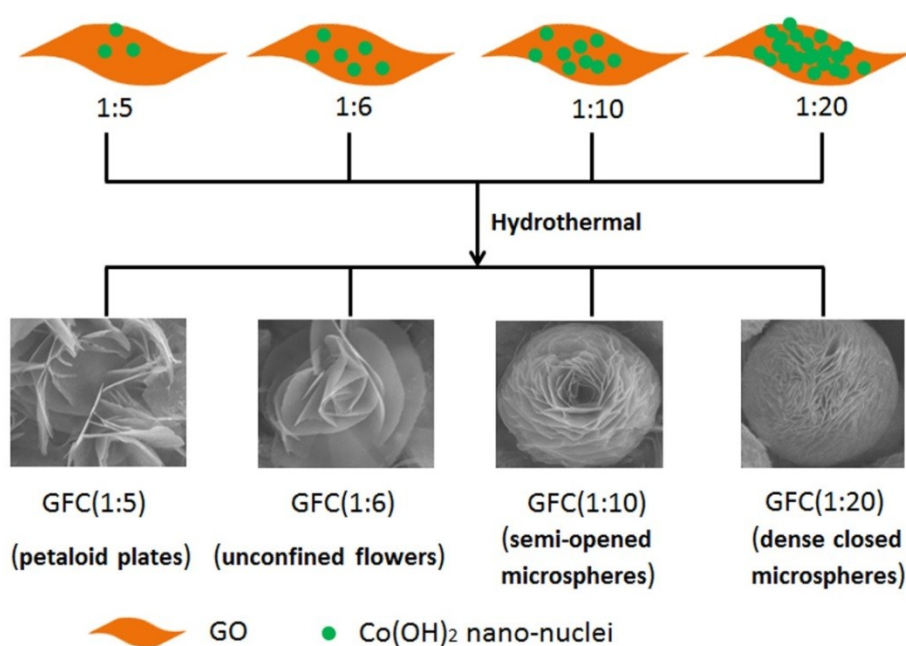

**Fig. S2** Schematic illustration of the growth morphologies of Co(OH)<sub>2</sub> of GFC. (1:5), (1:6), (1:10), and (1:20) present the GO : Co(Ac)<sub>2</sub>·4H<sub>2</sub>O weight ratios of (1:5), (1:6), (1:10), and (1:20), respectively, in the process of the synthesis.

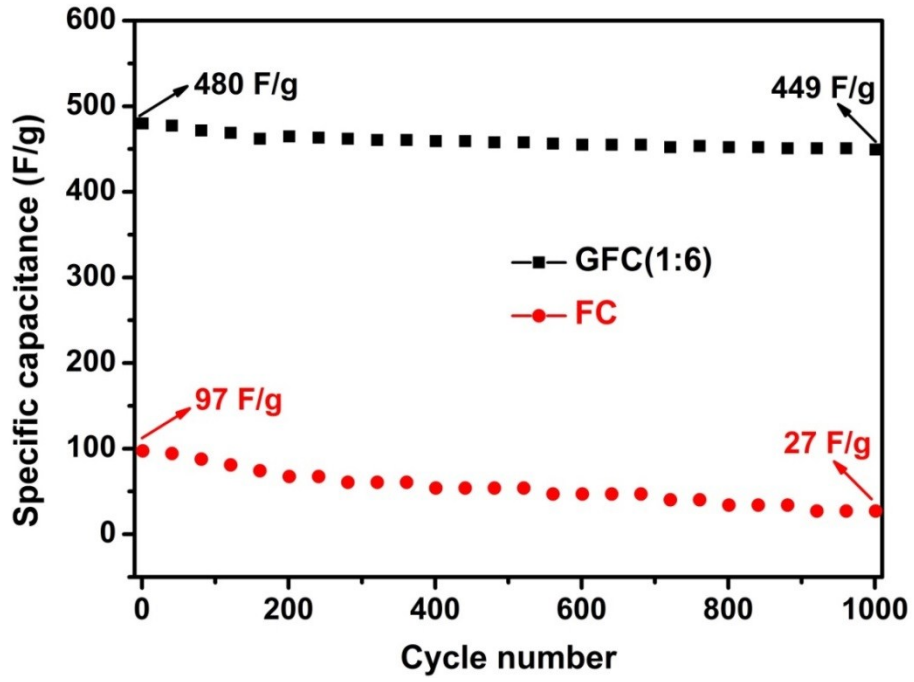

Fig. S3 Cycling performance of FC and GFC (1:6) at a current density of 1 A/g.

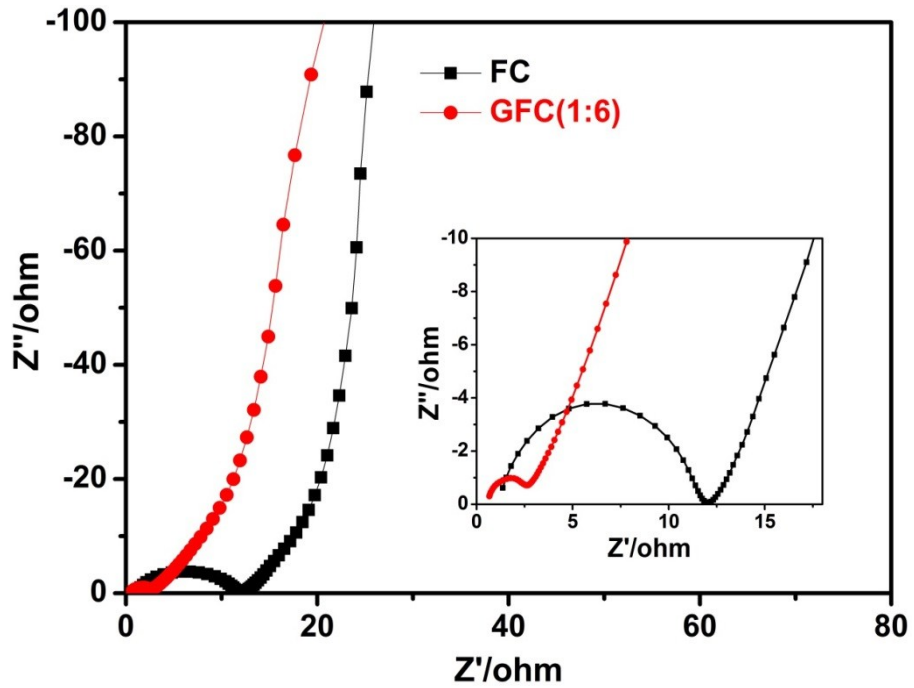

Fig. S4 Nyquist plots of FC and GFC (1:6) electrodes.
